# Supplementary material
Source: publisher site journal article supplement (https://www.dovepress.com/article/249205)
Supplement: Supplementary file 1 [file get_supplementary_file.php]

**Dual receptor-targeted and redox-sensitive polymeric micelles self-assembled from a folic acid-hyaluronic acid-SS-vitamin E succinate polymer for precise cancer therapy**

Yue Yang,1 Yunjian Li,1 Kai Chen,1 Ling Zhang,2 Sen Qiao,1 Guoxin Tan,1 Fen Chen,1, 3, 4, * Weisan Pan1, *

1 School of Pharmacy, Shenyang Pharmaceutical University, Shenyang 110016, People’s Republic of China

2 Department of Biotherapy, Cancer Research Institute, The First Affiliated Hospital of China Medical University, Shenyang 110001, People’s Republic of China

3 Key Laboratory of Ministry of Education for TCM Viscera-State Theory and Applications, Liaoning University of Traditional Chinese Medicine, Shenyang 110847, People’s Republic of China

4 Zhejiang Jingxin Pharmaceutical Co., Ltd, Zhejiang 312500, People’s Republic of China

* Corresponding author:

Weisan Pan

School of Pharmacy, Shenyang Pharmaceutical University, Shenyang 110016, People’s Republic of China

Tel.: +86 24 4352 0533

Fax: +86 24 4352 0533

Email address: pppwwwsss@163.com

Fen Chen

Key Laboratory of Ministry of Education for TCM Viscera-State Theory and Applications, Liaoning University of Traditional Chinese Medicine, Shenyang 110847, People’s Republic of China

Tel.: +86 24 3120 7125

Fax: +86 24 3120 7125

Email address: chenfen1121@163.com


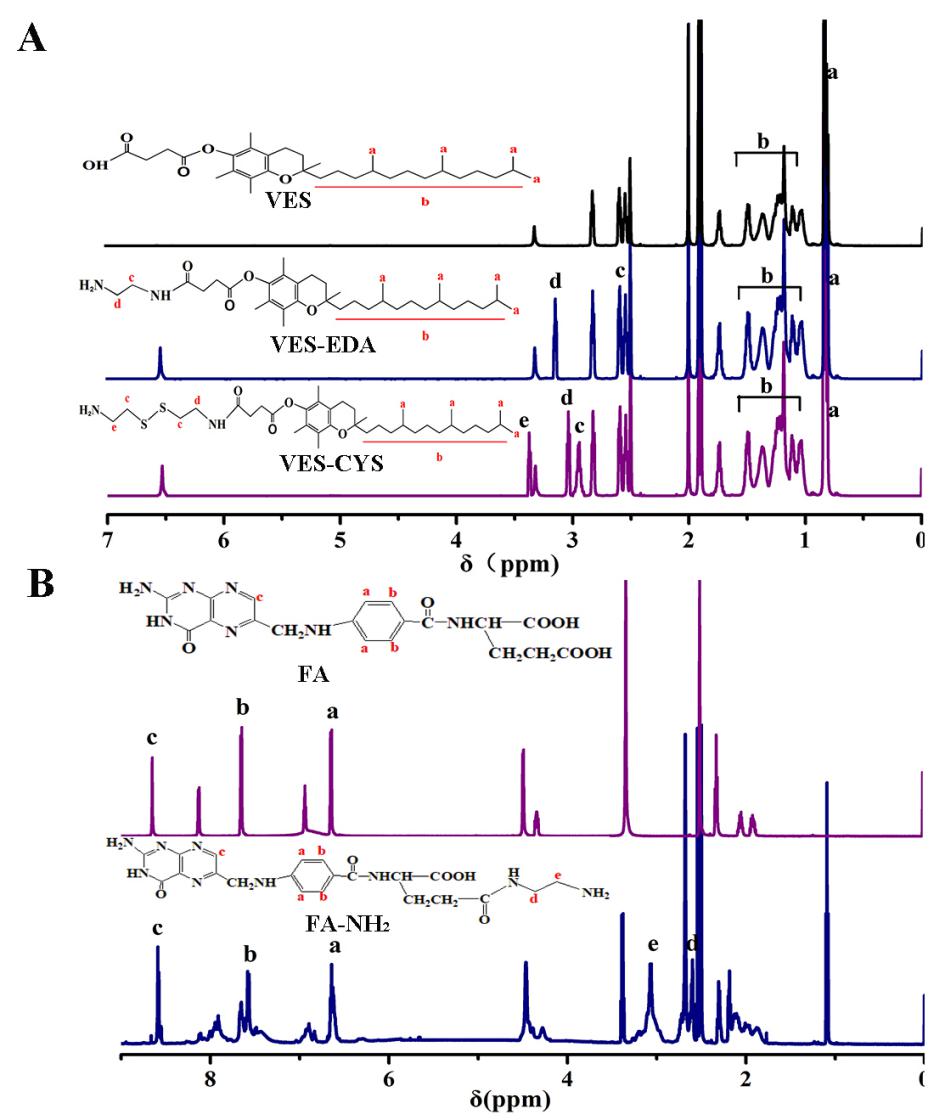


Figure S1 1H-NMR spectra of (A) VES, VES-EDA and VES-CYS (B) FA and FA-NH2 in DMSO-*d6*


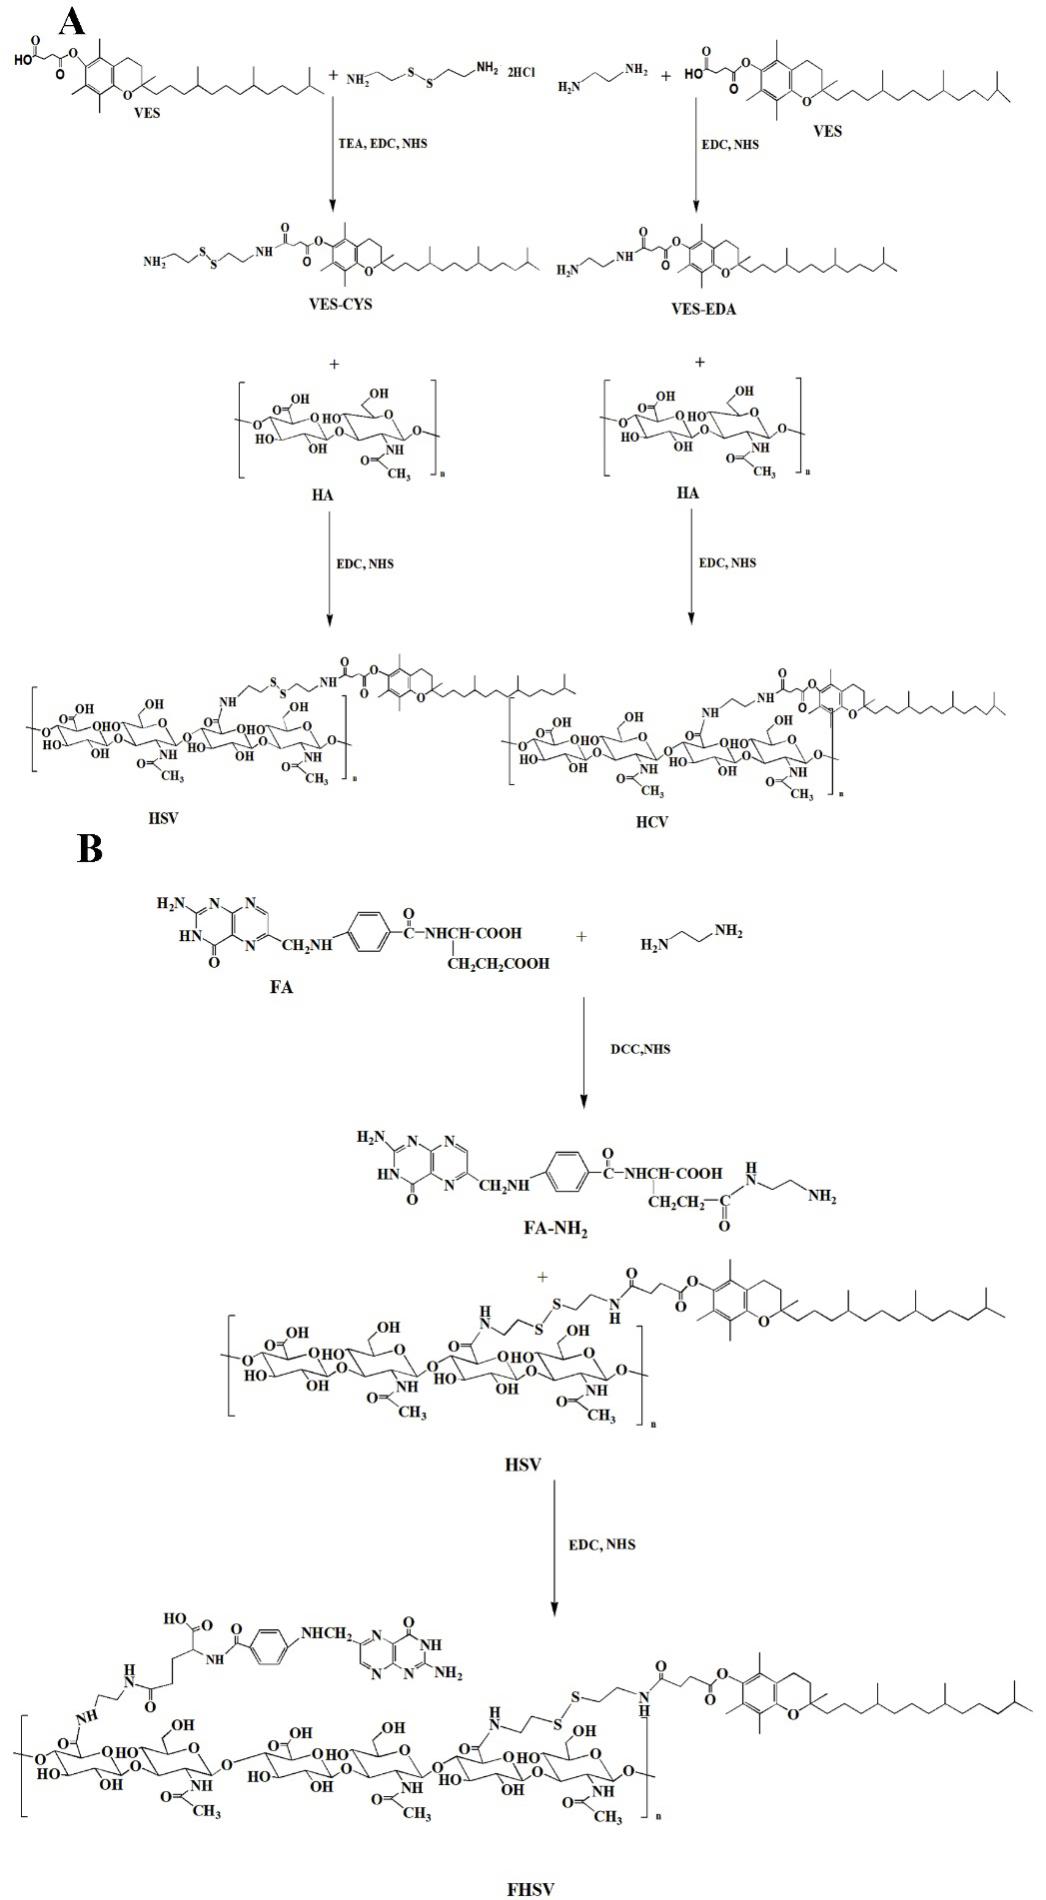


Figure S2 Synthesis scheme of (A) HCV and HSV (B) FHSV


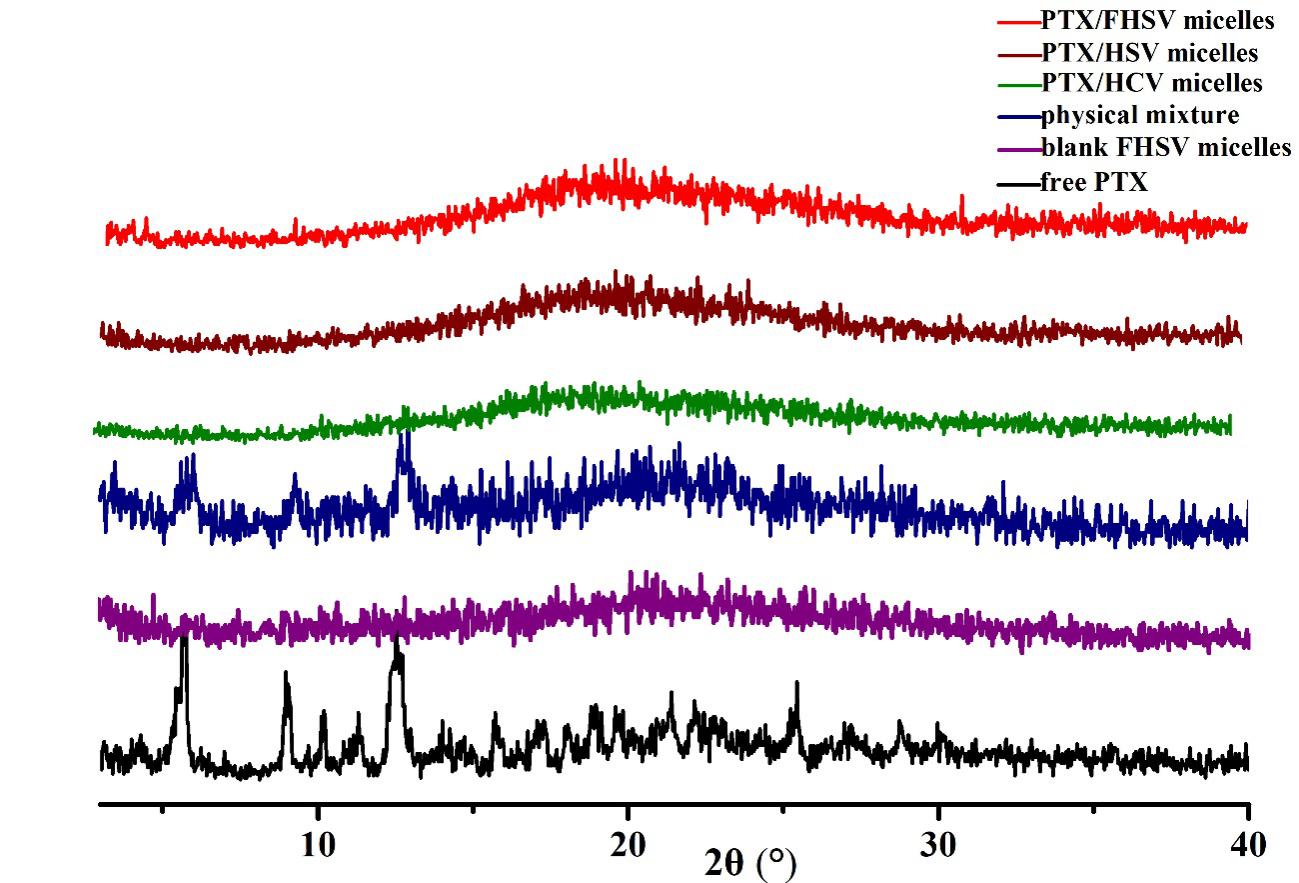


Figure S3 X-ray diffraction patterns of PTX, blank micelles, physical mixture of PTX and blank FHSV micelles, PTX/HCV micelles, PTX/HSV micelles and PTX/FHSV micelles


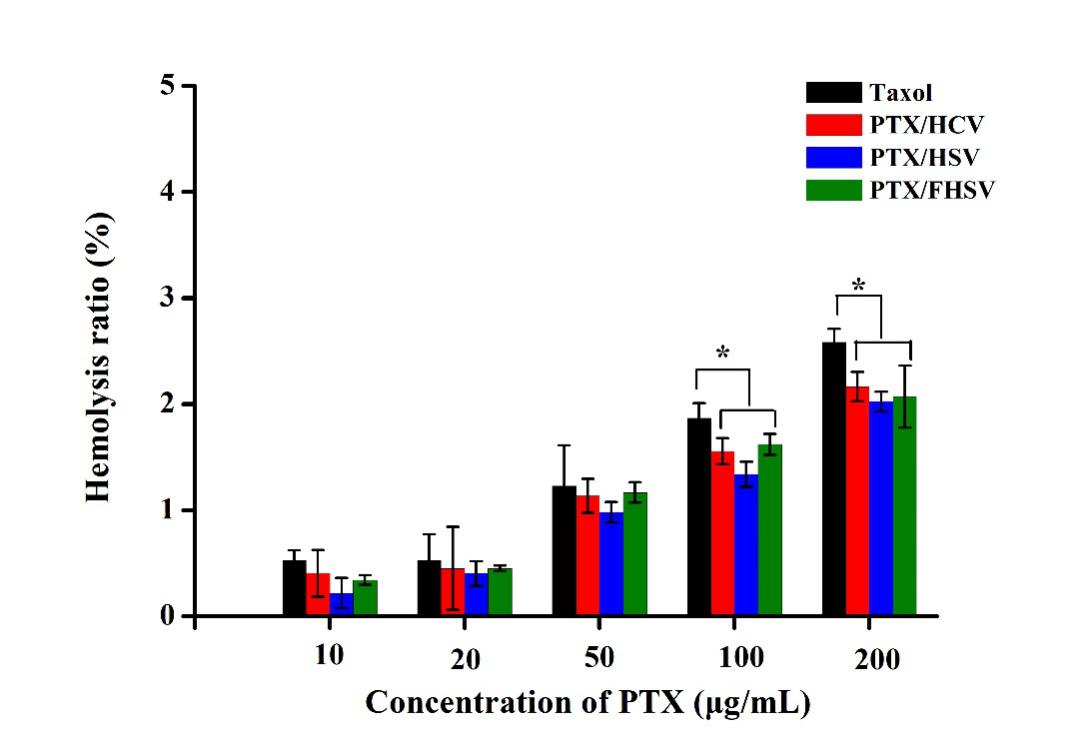


Figure S4 Hemolysis ratio of Taxol and PTX-loaded micelles (n=3). **p* < 0.05.


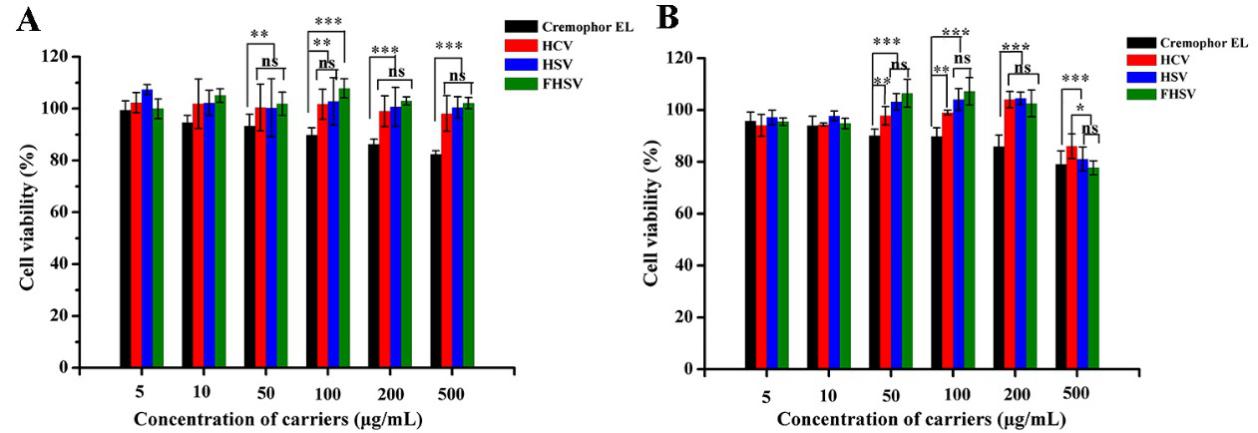


Figure S5 Cytotoxicity of blank carriers against (A) NIH3T3 cells and (B) MCF-7 cells (n=6). **p* < 0.05; ***p* < 0.01; ****p* < 0.001; *ns, p* > 0.05.
